# Supplementary material
Source: PubMed Central journal article supplement (PMC11028252)
Supplement: 262_2018_2115_MOESM1_ESM.pdf [file 262_2018_2115_MOESM1_ESM.pdf]

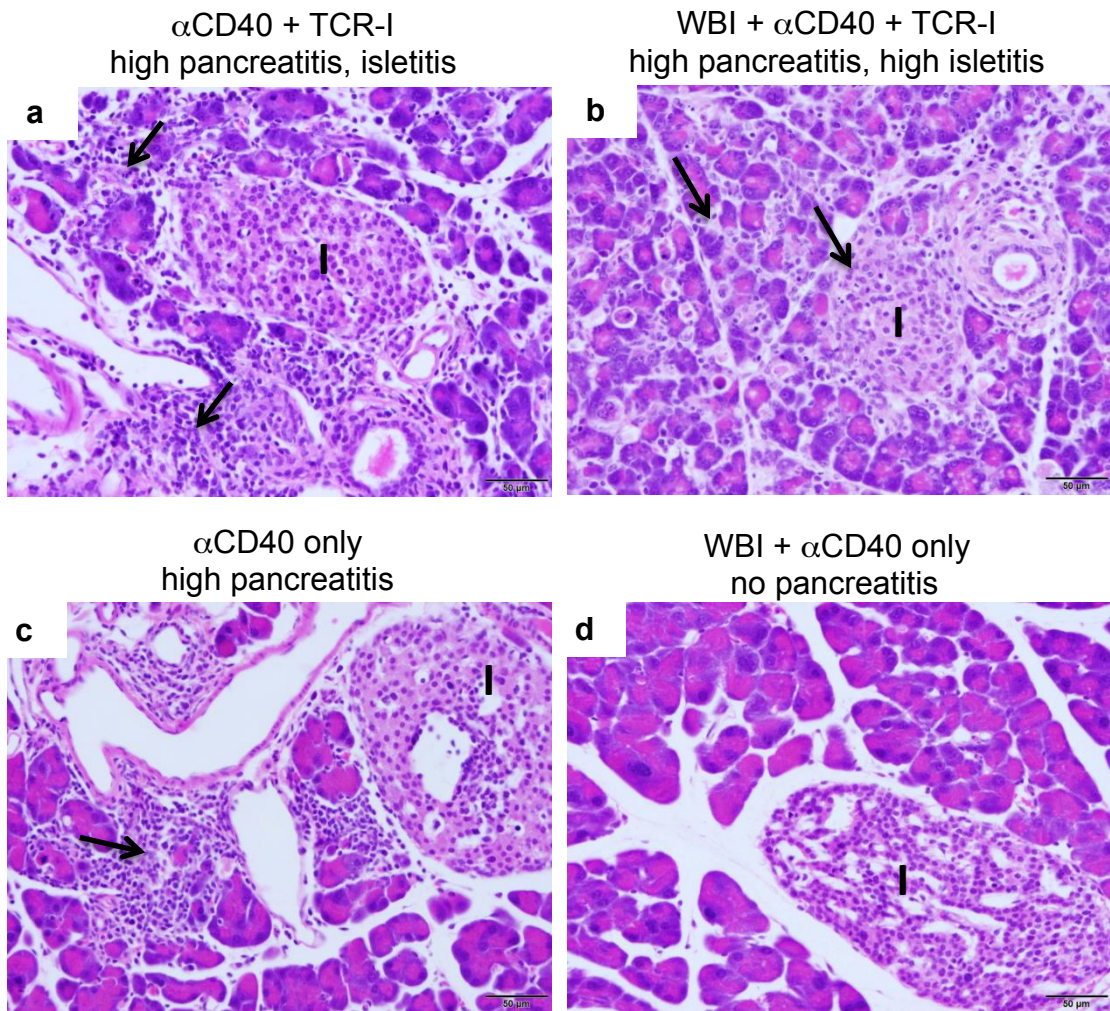

**Supplementary Figure 1. Pancreatitis and isletitis observed in treated RT4 mice at 7 days post adoptive transfer.** **a** High pancreatitis score observed in mice that received  $\alpha$ CD40 + TCR-I T cells with modest isletitis, **b** High pancreatitis and high isletitis in mice that received dual-conditioning + TCR-I T cells, **c** Pancreatitis in mice that received only  $\alpha$ CD40 conditioning, and **d** Lack of inflammation in mice that received WBI +  $\alpha$ CD40. Islets are indicated by I and areas of inflammation are indicated by the arrows.

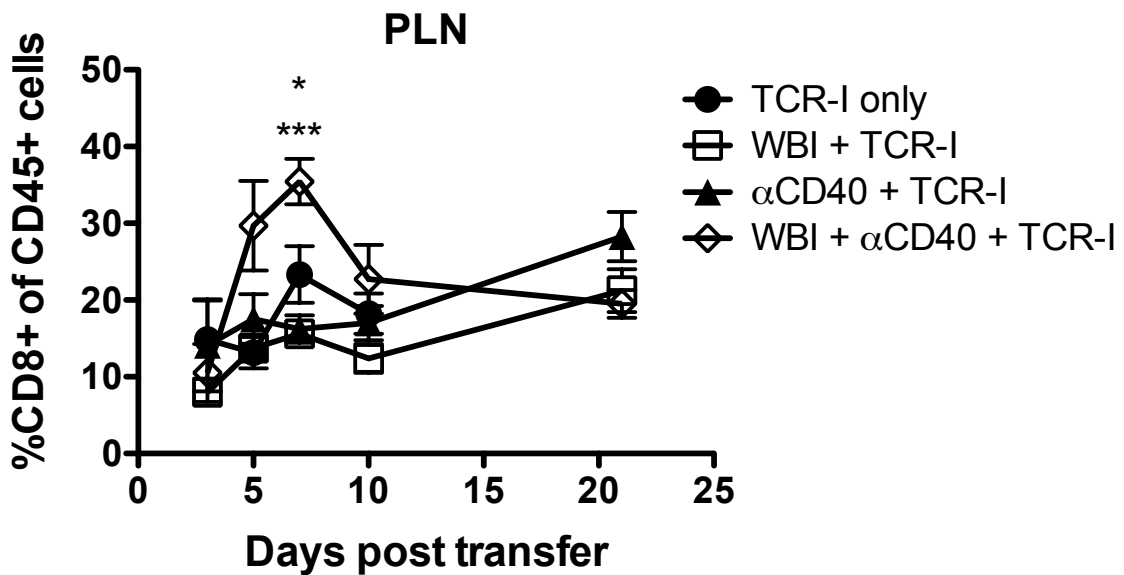

**Supplementary Figure 2. Dual conditioning with ACT increases the proportion of CD8+ T cells in the PLN.** Percentage of CD8+ cells accumulating in the PLN of the same mice shown in figure 3a. WBI+αCD40+TCR-I vs. TCR-I only (\*), vs. WBI+TCR-I or αCD40+TCR-I (\*\*\*) at day 7.
